# Supplementary figures and images for: Empty conformers of HLA-B preferentially bind CD8 and regulate CD8+ T cell function
Source: eLife journal article supplement (doi:10.7554/elife.36341), 2018-05-09

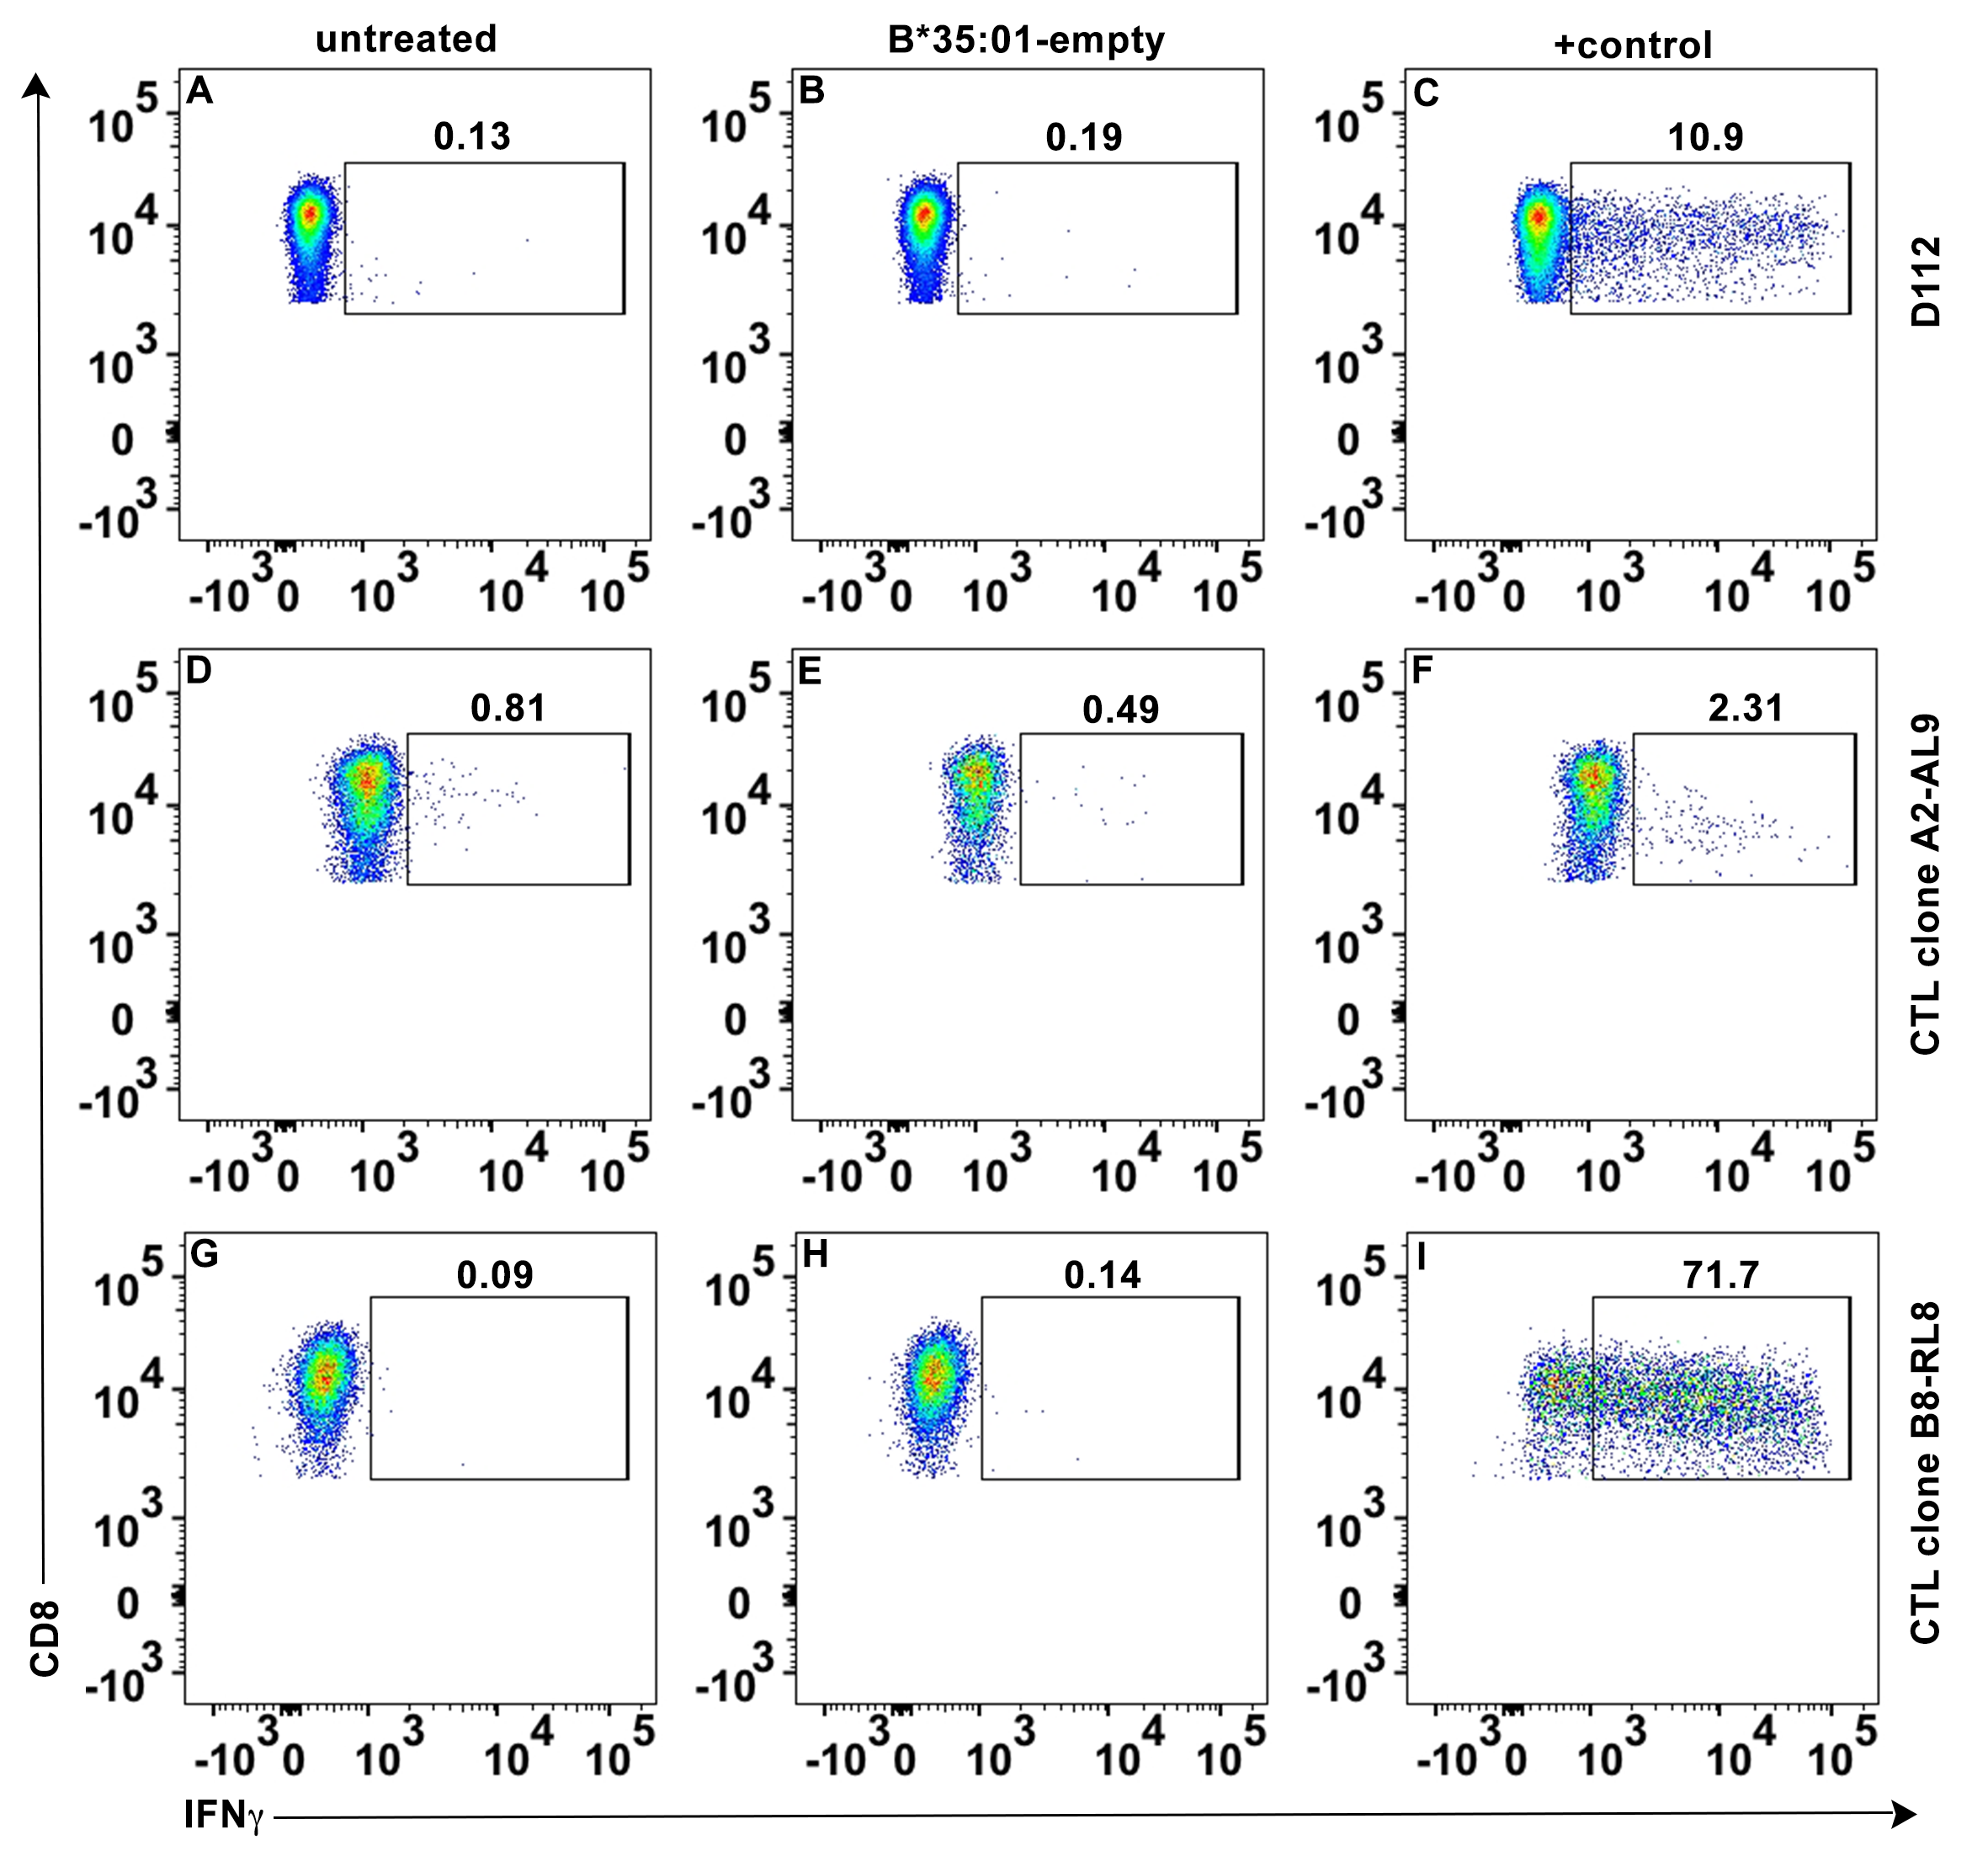

Supplement: supp [file elife-36341-supp-v1.zip › elife_poa_e36341_Figure_4_figure_supplement_1.tif]

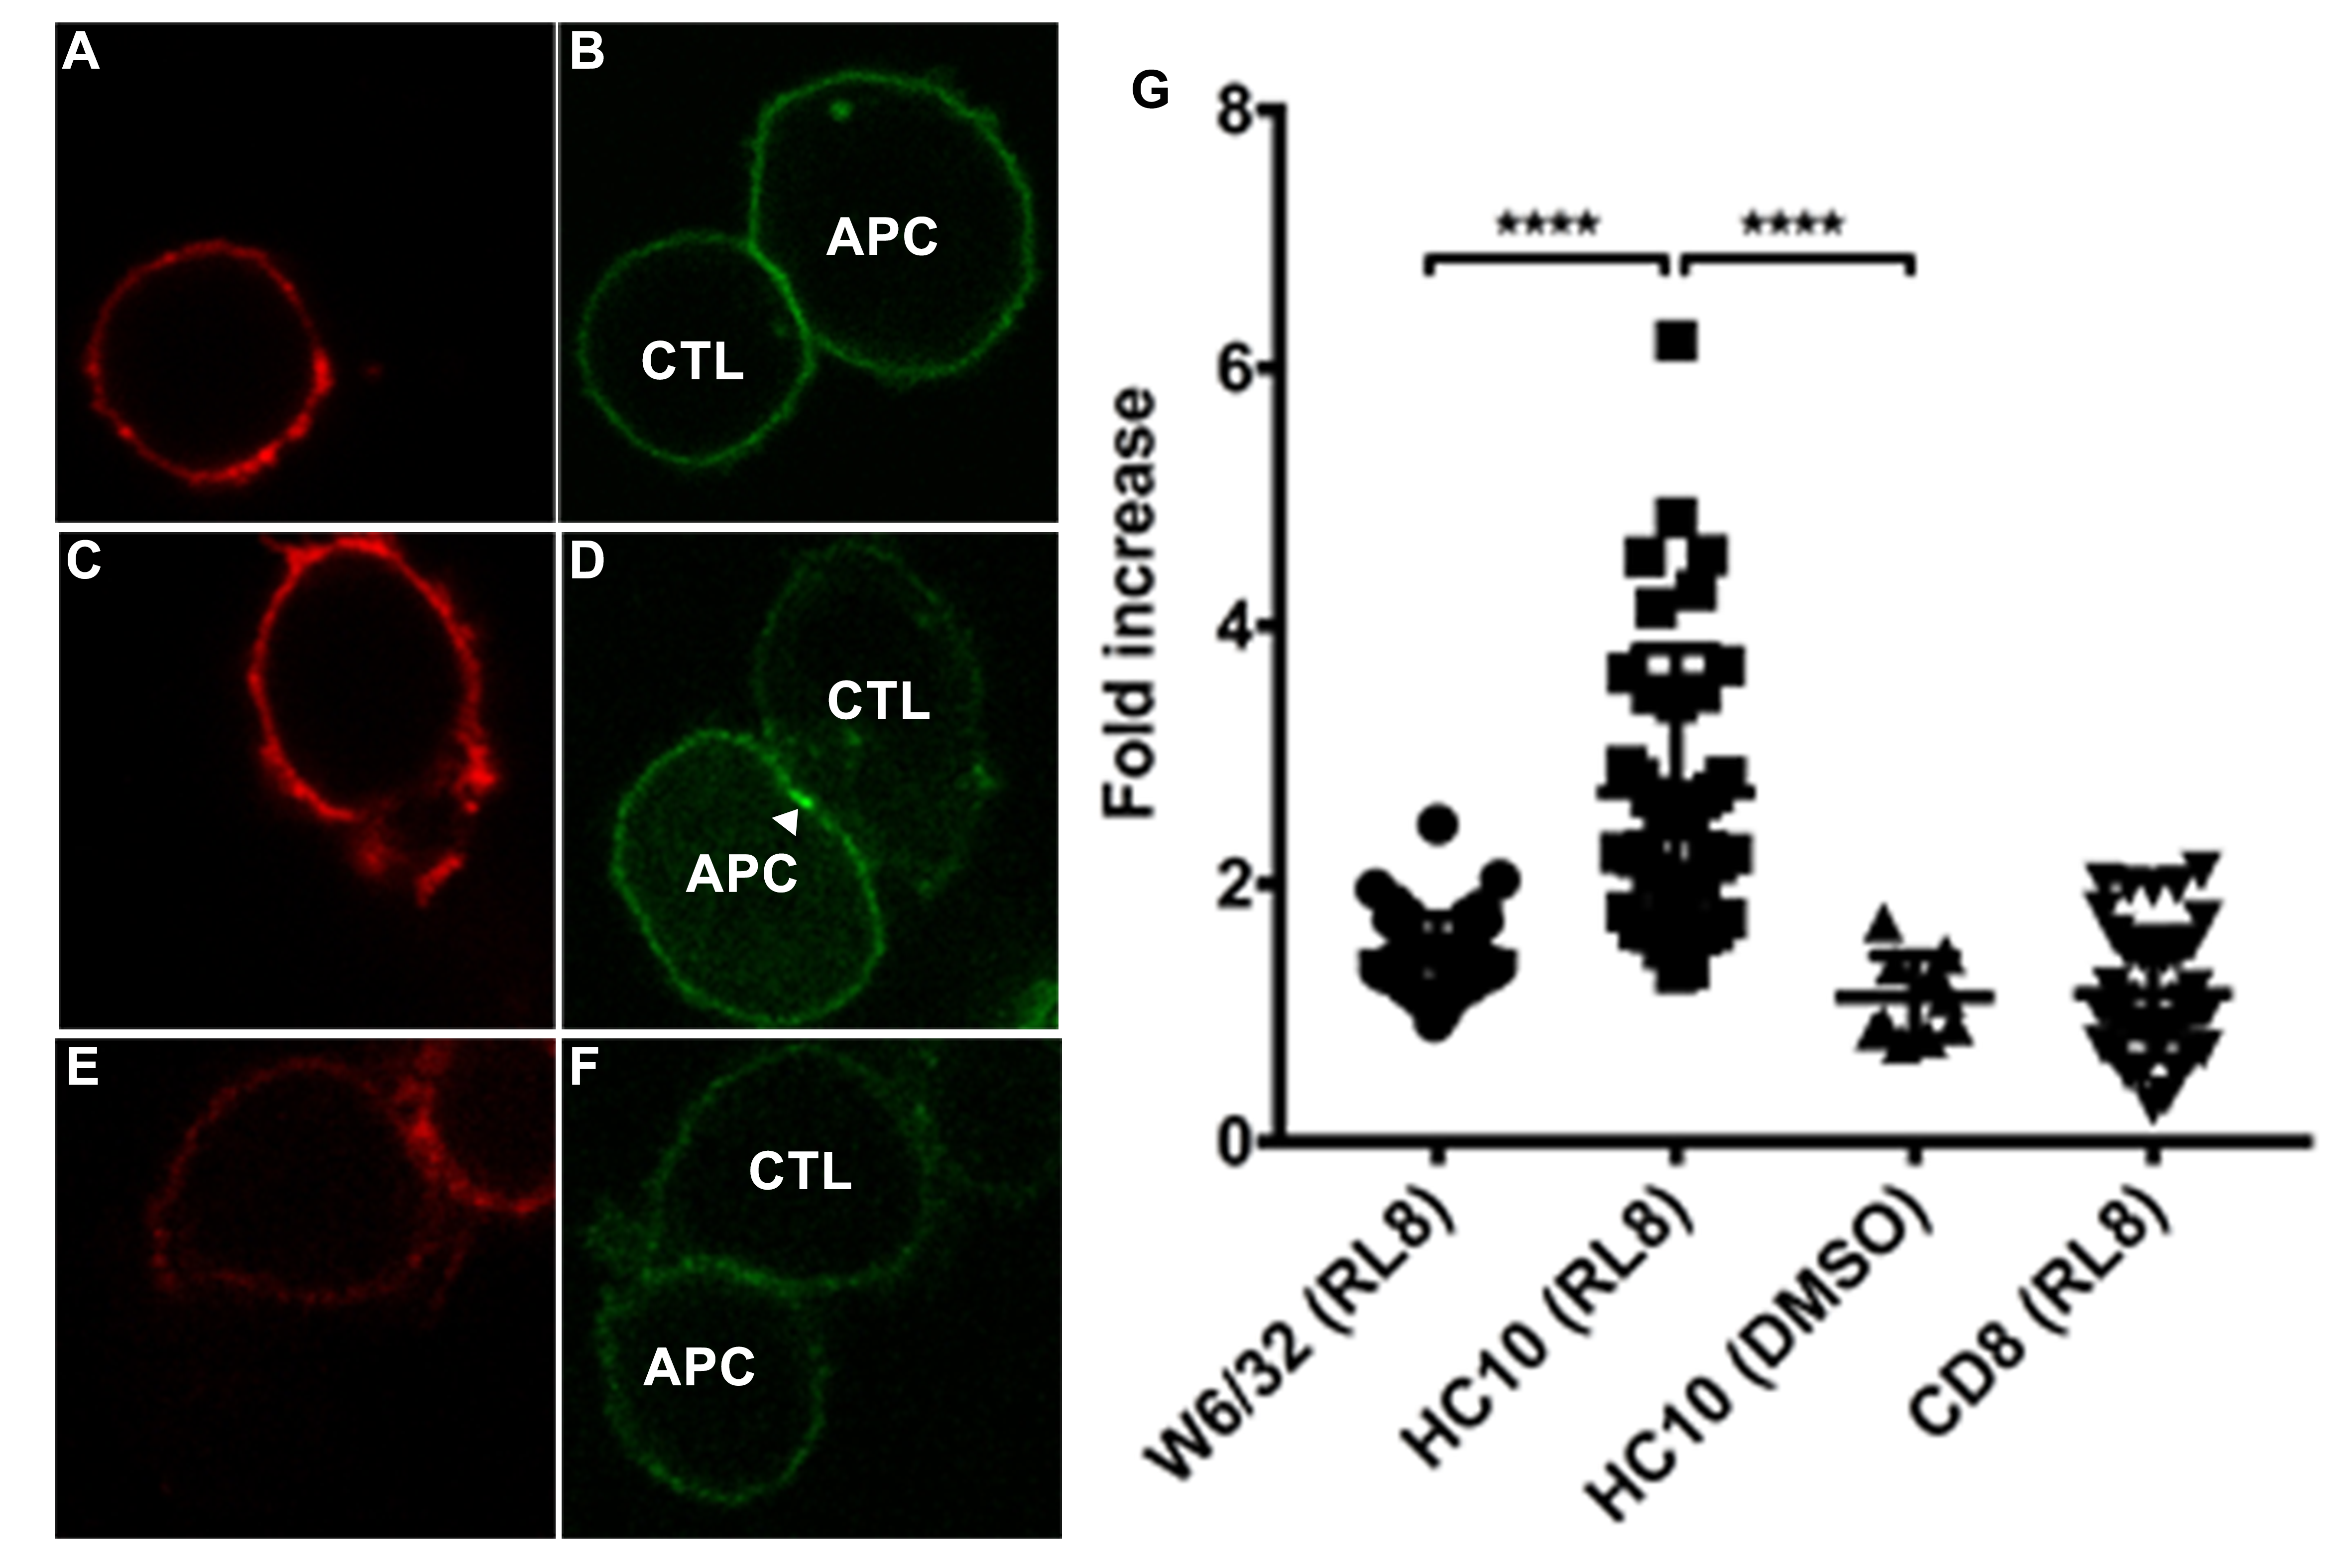

Supplement: supp [file elife-36341-supp-v1.zip › elife_poa_e36341_Figure_5_figure_supplement_1.tif]

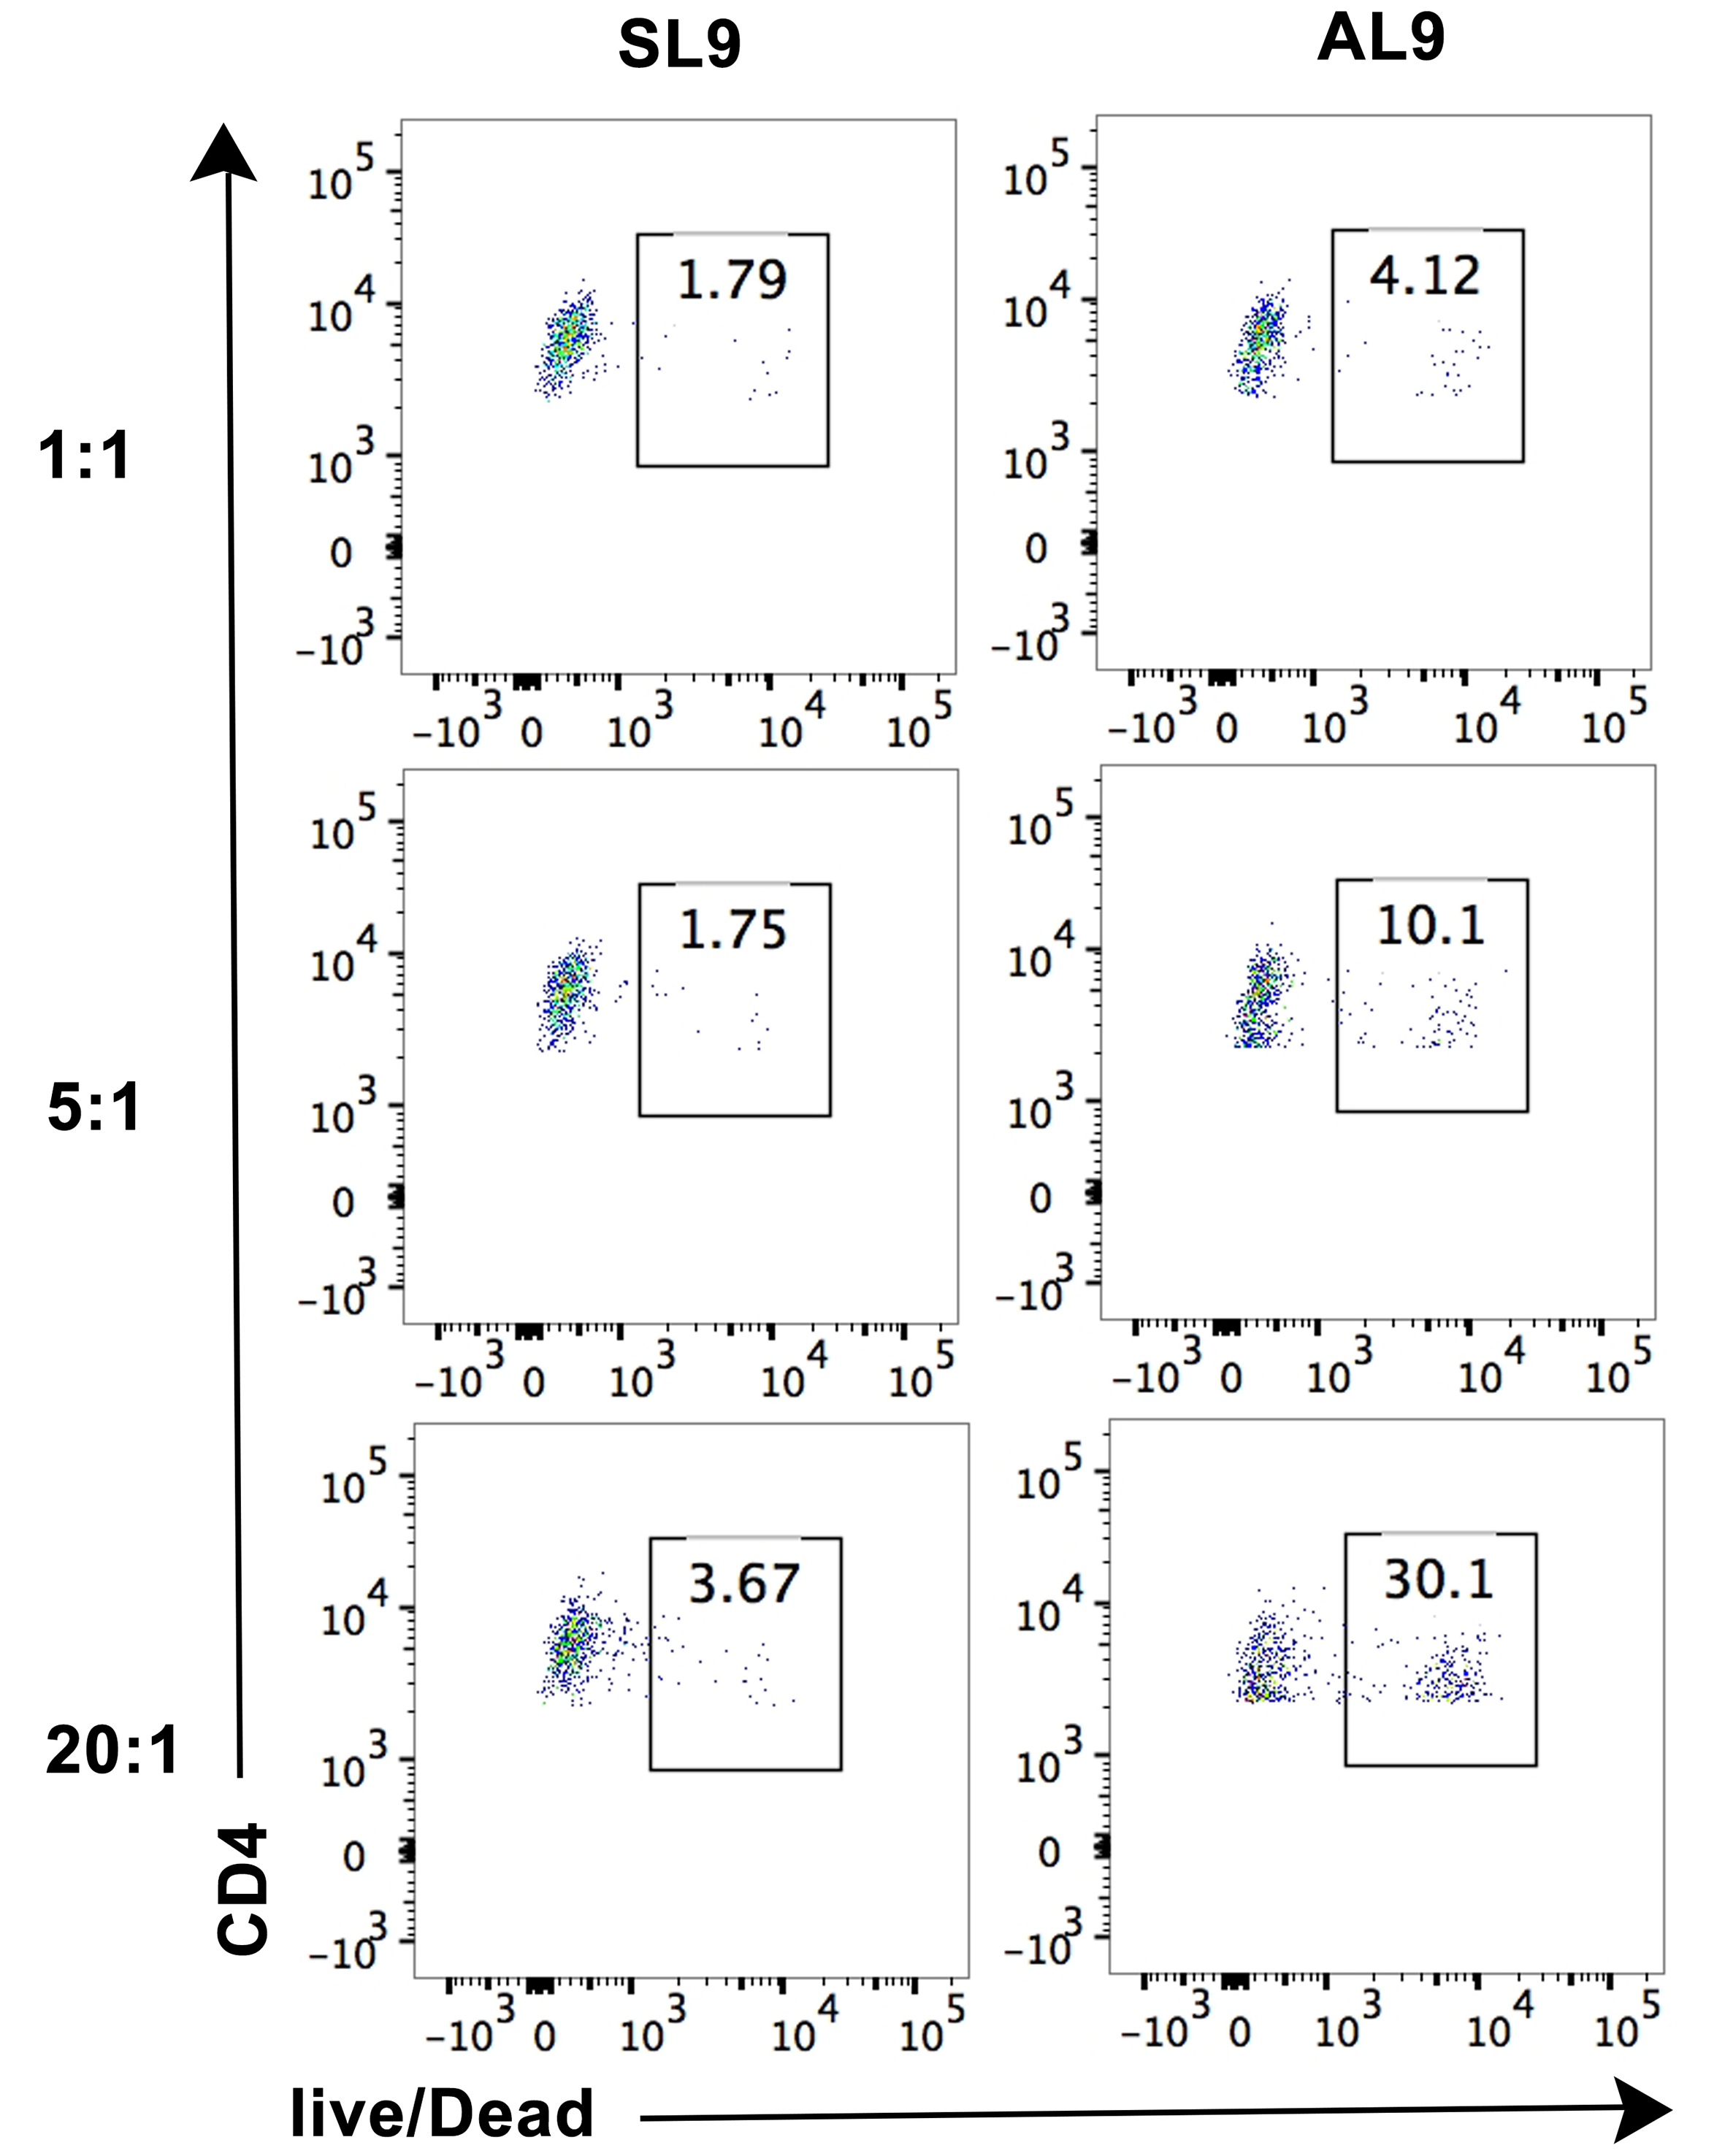

Supplement: supp [file elife-36341-supp-v1.zip › elife_poa_e36341_Figure_6_figure_supplement_1.tif]
